# Supplementary material
Source: PubMed Central journal article supplement (PMC2990348)
Supplement: NIHMS247731-supplement-1_si_001.pdf [file NIHMS247731-supplement-1_si_001.pdf]

## Supporting Information

# Synthesis of a 6-Methyl-7-Deaza Analogue of Adenosine that Potently Inhibits Replication of Polio and Dengue Viruses

Runzhi Wu, Eric D. Smidansky, HyungSuk OH, RatreTakhampunya, Radhakrishnan Padmanabhan, Craig E. Cameron, and Blake R. Peterson\*

*Department of Medicinal Chemistry, The University of Kansas, Lawrence, KS 66047, Department of Biochemistry and Molecular Biology, The Pennsylvania State University, University Park, PA 16802, and Department of Microbiology and Immunology, Georgetown University School of Medicine, Washington DC 20057*

### Table of Contents

|                                     |             |
|-------------------------------------|-------------|
| Analysis of compound purity by HPLC | Pages S2-S4 |
| Guanidine resistance assay data     | Page S4     |
| Table S1                            | Page S4     |
| NTP incorporation assay data        | Page S5     |
| Figure S8                           | Page S5     |
| Figure S9                           | Page S6     |
| Figure S10                          | Page S7     |
| Figure S11                          | Page S8     |

### Analysis of compound purity by analytical HPLC

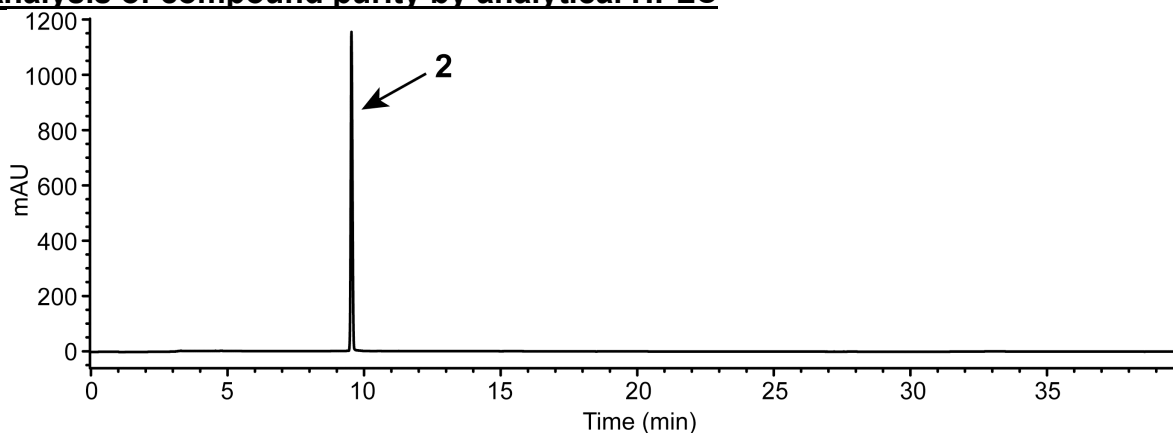

**Figure S1.** Analytical reverse-phase HPLC profile of 6-methyl-9- $\beta$ -D-ribofuranosylpurine(**2**) after recrystallization. Retention time = 9.5 min. Purity = 98 %. Absorbance wavelength = 254 nm.

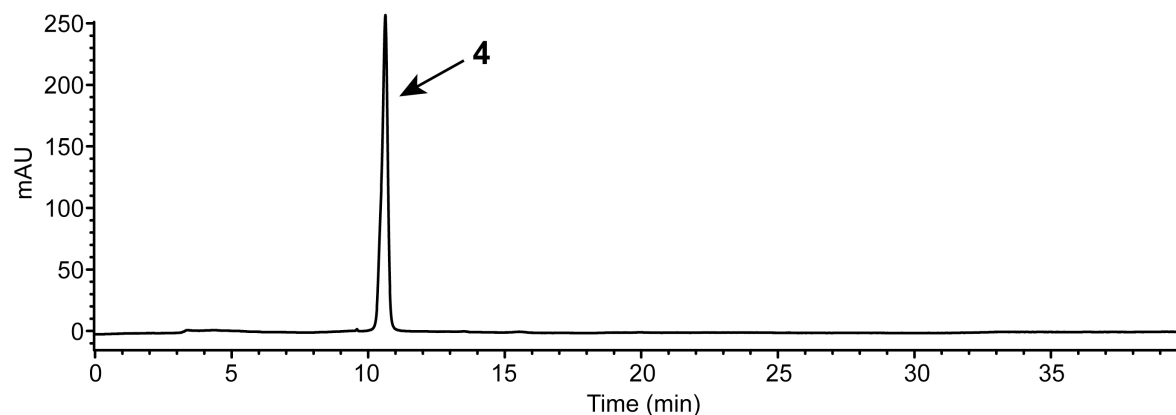

**Figure S2.** Analytical reverse-phase HPLC profile of 7-methyl-3- $\beta$ -D-ribofuranosyl-3*H*-imidazo[4,5-*b*]pyridine (1-deaza-6-methyl-9- $\beta$ -D-ribofuranosylpurine, **4**) after recrystallization. Retention time = 10.6 min. Purity = 98%. Absorbance wavelength = 254 nm.

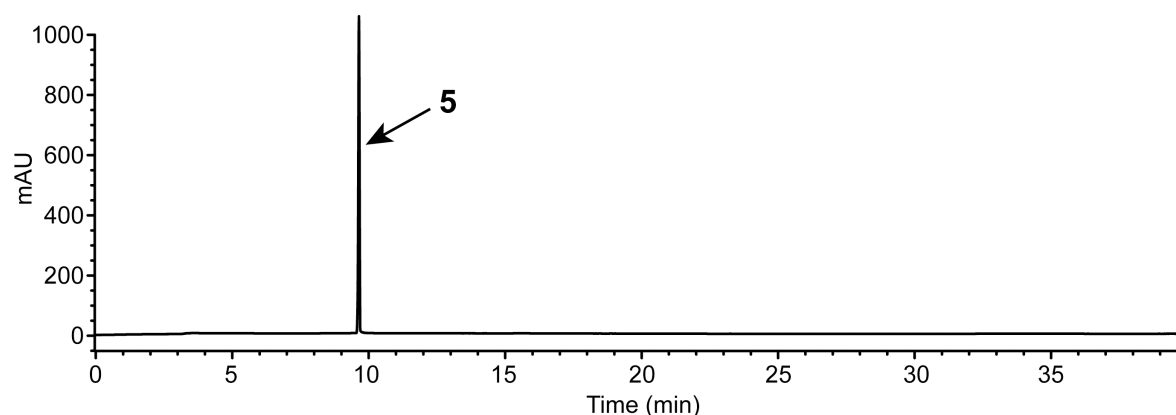

**Figure S3.** Analytical reverse-phase HPLC profile of 4-methyl-1- $\beta$ -D-ribofuranosyl-1*H*-imidazo[4,5-*c*]pyridine (3-deaza-6-methyl-9- $\beta$ -D-ribofuranosylpurine, **5**) after recrystallization. Retention time = 9.6 min. Purity = 99 %. Absorbance wavelength = 254 nm.

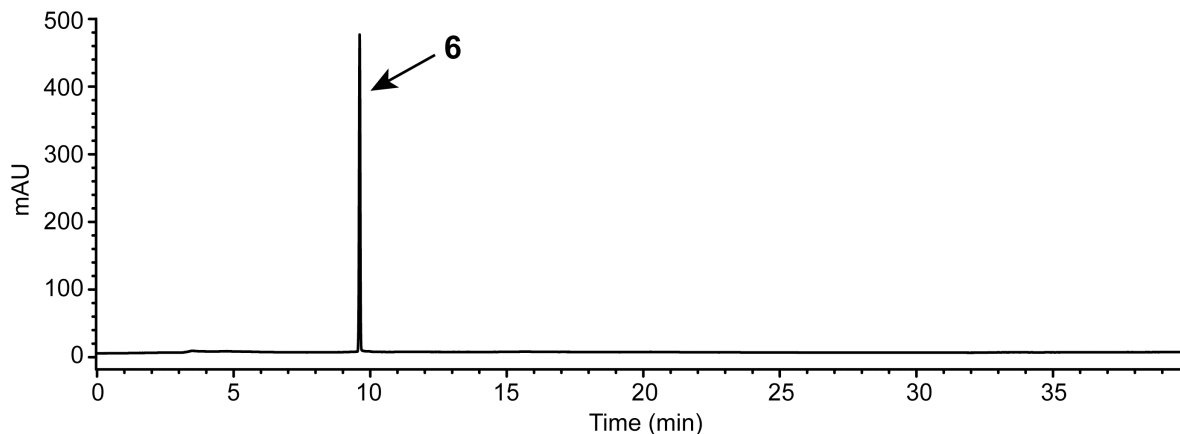

**Figure S4.** Analytical reverse-phase HPLC profile of 4-methyl-7- $\beta$ -D-ribofuranosylpyrrolo[2,3-*d*]pyrimidine (7-deaza-6-methyl-9- $\beta$ -D-ribofuranosylpurine, **6**) after recrystallization. Retention time = 9.6 min. Purity = 98 %. Absorbance wavelength = 254 nm.

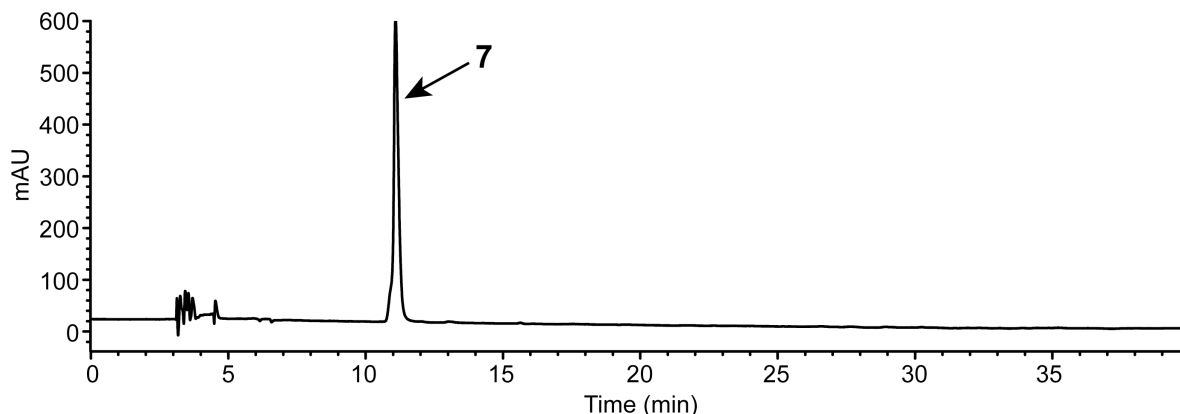

**Figure S5.** Analytical reverse-phase HPLC profile of 4-methyl-7-(5'-O-methyl- $\beta$ -D-ribofuranosyl)pyrrolo[2,3-*d*]pyrimidine (7-deaza-6-methyl-9-(5'-O-methyl- $\beta$ -D-ribofuranosyl)purine, **7**). Retention time = 11.1 min. Purity = 98 %. Absorbance wavelength = 254 nm.

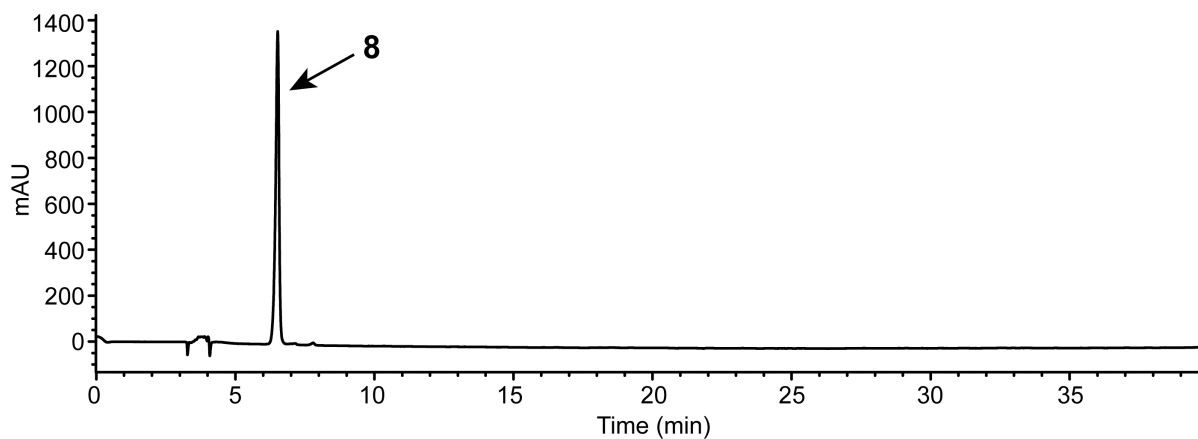

**Figure S6.** Analytical reverse-phase HPLC profile of 6-methyl-9- $\beta$ -D-ribofuranosylpurine 5'-triphosphate (**8**). Retention time = 6.3 min. Purity = 98%. Absorbance wavelength = 254 nm.

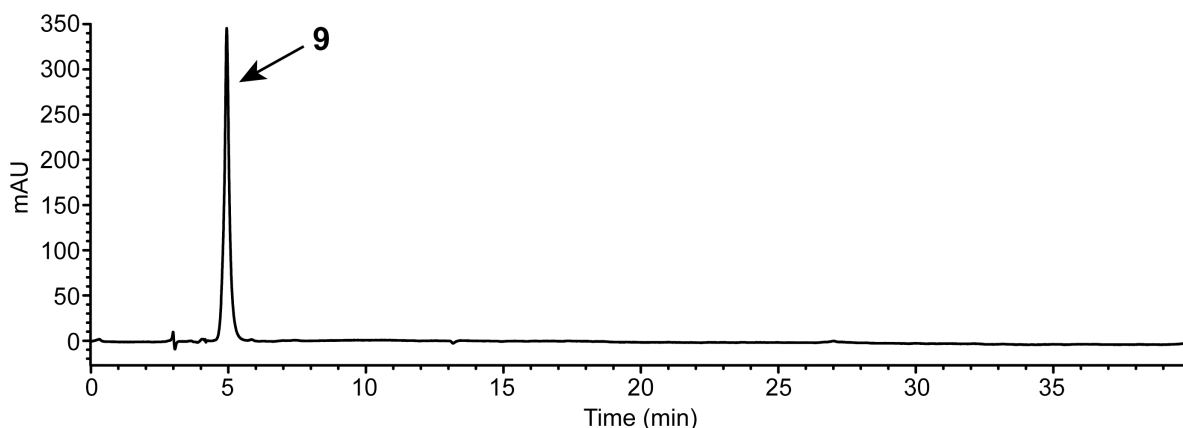

**Figure S7.** Analytical reverse-phase HPLC profile of 4-methyl-7- $\beta$ -D-ribofuranosylpyrrolo[2,3-*d*]pyrimidine5'-triphosphate (7-deaza-6-methyl-9- $\beta$ -D-ribofuranosylpurine 5'-triphosphate, **9**). Retention time = 4.9 min. Purity = 95 %. Absorbance wavelength = 254 nm.

### Guanidine resistance assay data

|                          |           |           |          |          |          |          |
|--------------------------|-----------|-----------|----------|----------|----------|----------|
| Compound                 | Ribavirin | Ribavirin | <b>2</b> | <b>2</b> | <b>6</b> | <b>6</b> |
| Conc. ( $\mu$ M)         | 150       | 300       | 1.62     | 3.24     | 0.046    | 0.092    |
| Gua <sup>r</sup> plaques | 150       | >250      | 12       | 22       | 19       | 17       |

**Table S1.** Formation of guanidine-resistant plaques by **2**, **6** and ribavirin (a mutagenic control) in a guanidine resistance assay of viral mutagenesis.

## NTP assay data

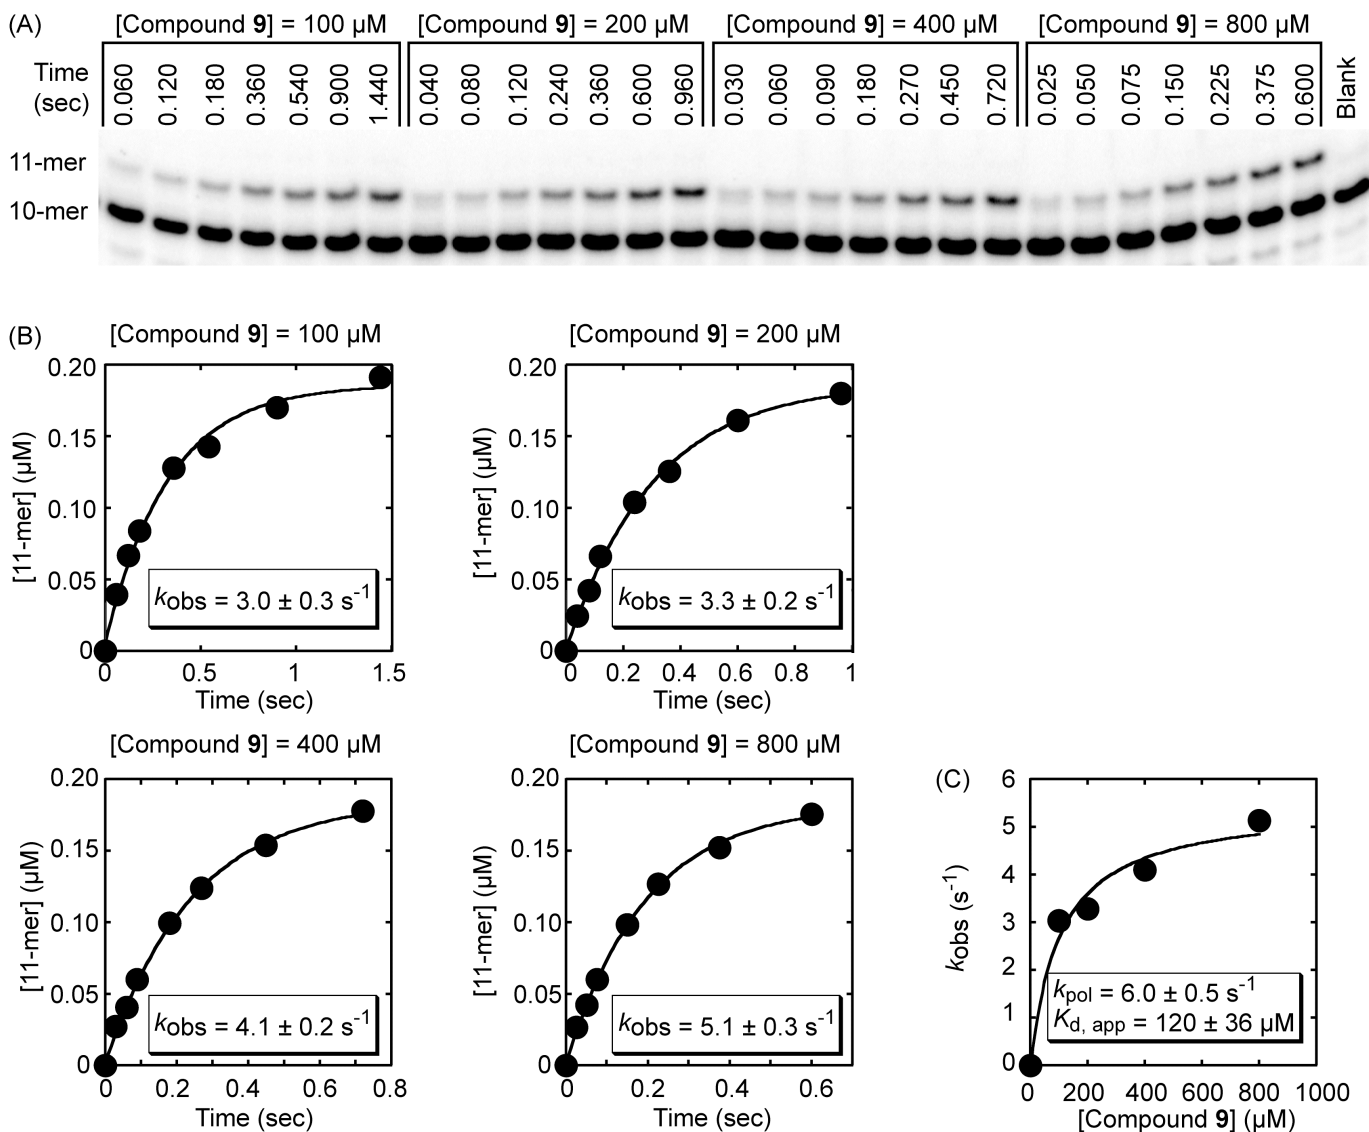

**Figure S8.** Panels A-C: Pre-steady state kinetics of incorporation of **9** into RNA opposite template U by PV RdRP. Panel A: Image of SDS PAGE gel of extended 10-mer  $^{32}\text{P}$ -labeled RNA substrate (illustrated in Figure 3, Panel D) using 100, 200, 400 or 800  $\mu\text{M}$  of **9**. Fast time points were taken using a chemical quench-flow rapid kinetics apparatus (KinTek Corp.). Panel B: Fits of 11-mer product formation as a function of time to a single exponential model, yielding observed rate constants,  $k_{\text{obs}}$ . Panel C: Replot of observed rate constants as a function of the concentration **9** and fit to a hyperbolic model yielding estimates of  $k_{\text{pol}}$ , the maximal rate constant for a single incorporation, and  $K_{\text{d,app}}$ , the kinetically-measured binding constant of **9** to the PV RdRP-RNA complex. Use of the chemical quench-flow apparatus to measure incorporation kinetics and fits to models were essentially as described in a reported procedure (*Biochemistry* **2004**, 43, 5126-5137). Note that compound **9** is fluorescent, preventing use of the stopped-flow apparatus to measure kinetics of incorporation, as was possible for non-fluorescent **8** (Figure S9).

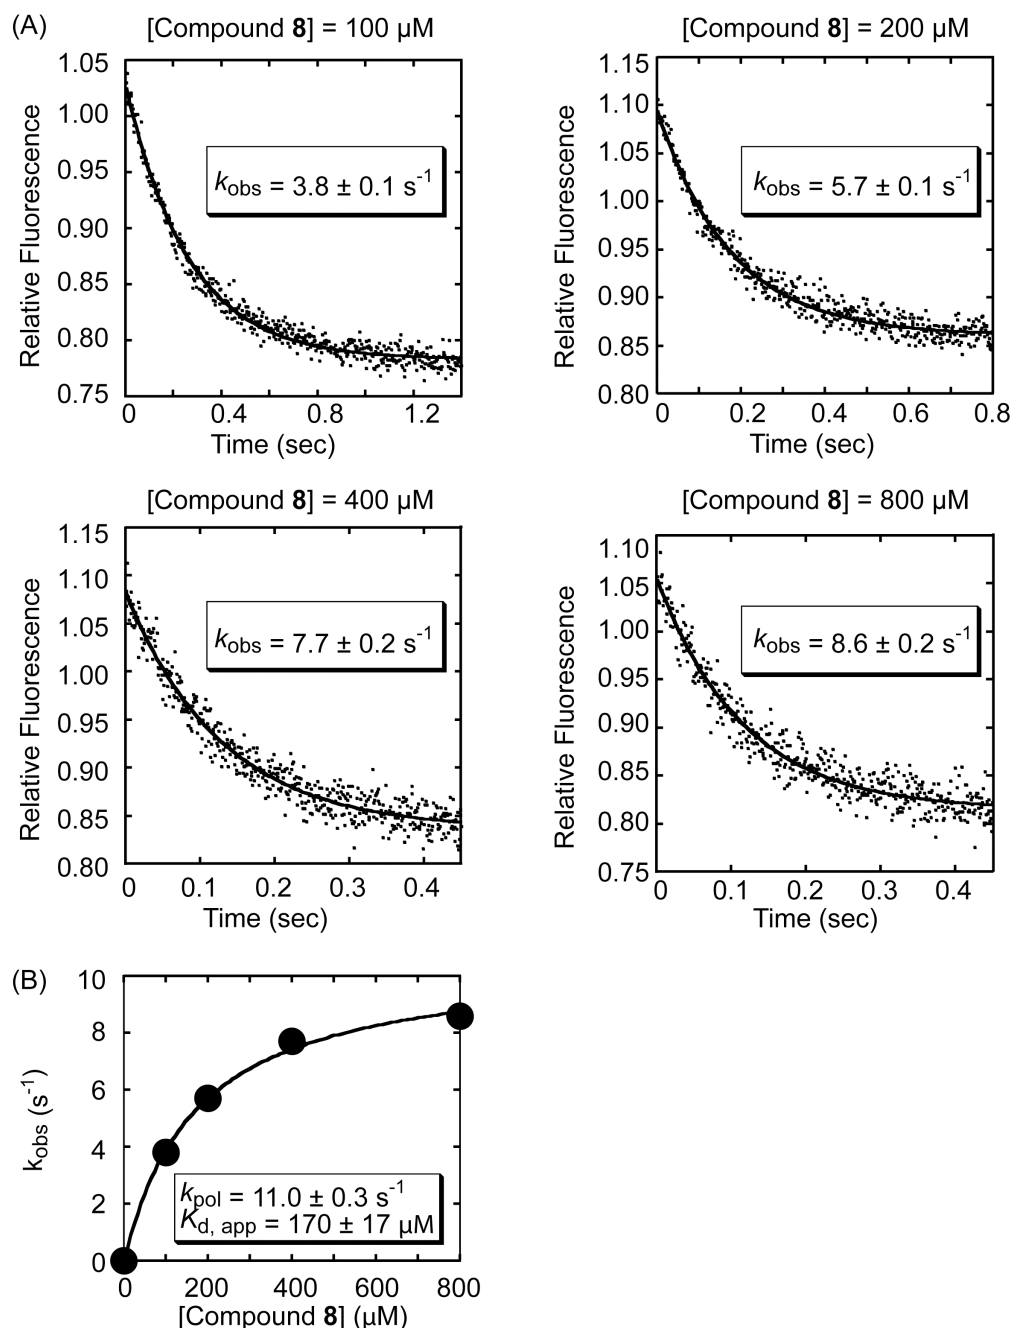

**Figure S9.** Pre-steady state kinetics of incorporation of **8** into RNA opposite template U by PV RdRP. Panel A: Time courses of incorporation of **8** into RNA by PV RdRP measured with a stopped-flow rapid kinetics apparatus (KinTek Corp.), using an RNA substrate containing the fluorescent reporter 2-aminopurine (*Proc. Natl. Acad. Sci. U.S.A.* **2007**, *104* (11), 4267-4272). Four concentrations of **8** were examined: 100, 200, 400 and 800  $\mu\text{M}$ . The change in fluorescence as a function of time was fit to a single exponential model yielding observed rate constants,  $k_{\text{obs}}$ . Panel B: Replot of the observed rate constants as a function of the concentration of **8** and fit to a hyperbolic model yielding estimates of  $k_{\text{pol}}$  and  $K_{\text{d,app}}$ . Use of the stopped-flow apparatus to measure incorporation kinetics was essentially as previously described (*Proc. Natl. Acad. Sci. U.S.A.* **2007**, *104* (11), 4267-4272).

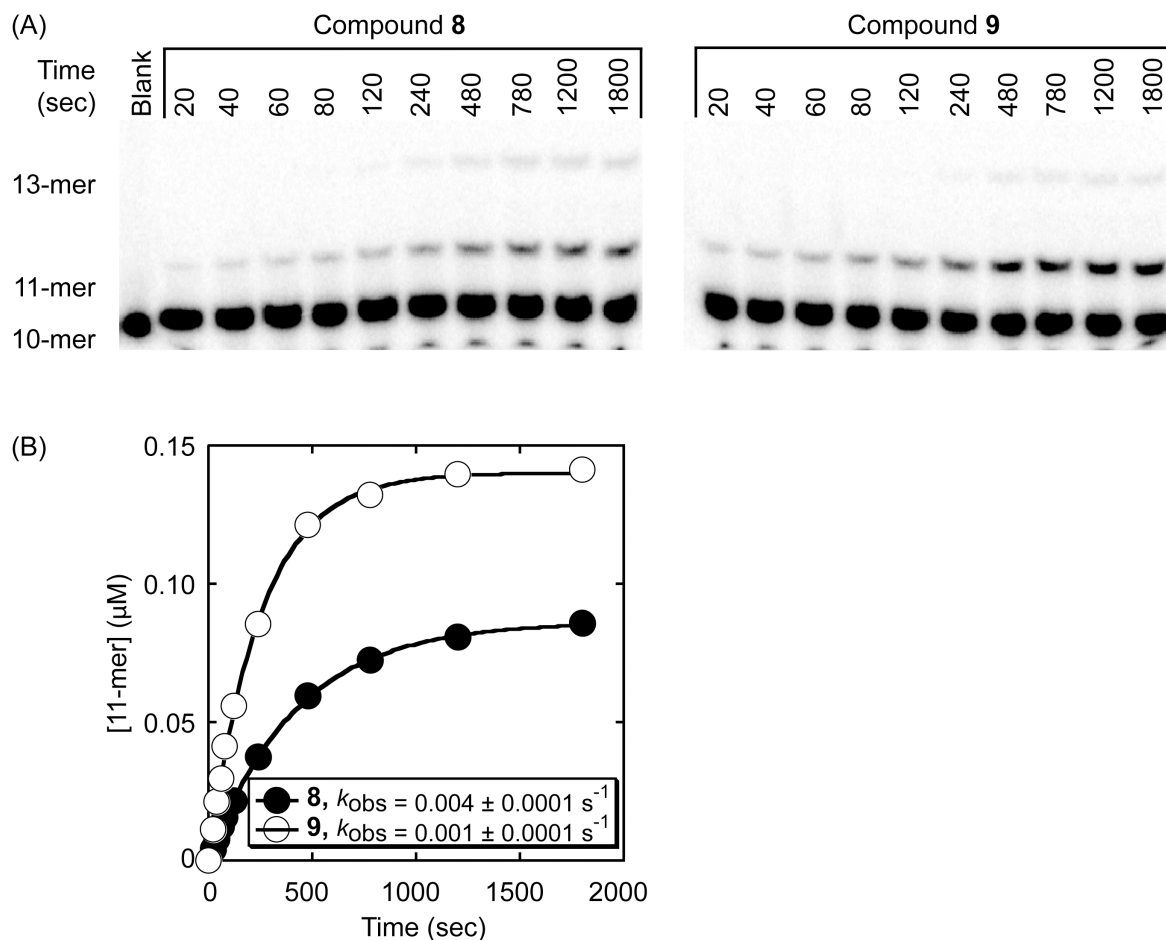

**Figure S10.** Pre-steady state kinetics of incorporation of compounds **8** and **9** into RNA opposite template C by PV RdRP. Panel A: image of SDS PAGE gel loaded with the extended 10-mer  $^{32}\text{P}$ -labeled RNA substrate (illustrated in Figure 3, Panel B) using 2 mM **8** or **9**. The  $\text{Mg}^{2+}$  concentration was adjusted to maintain 4 mM free  $\text{Mg}^{2+}$  above the concentration of **8** or **9**. A fifty-fold excess concentration of unlabeled RNA was added at the time of **8** or **9** addition to trap free PV RdRP, thus preventing multiple initiation events by the polymerase. Panel B: Time courses of product formation fitted to a single exponential model.  $k_{\text{obs}}$  values were further analyzed and refined by simulation to a mechanism that takes into account RdRP-RNA complex dissociation occurring at a rate that competes with the slow rate of **8** or **9** incorporation (data not shown).

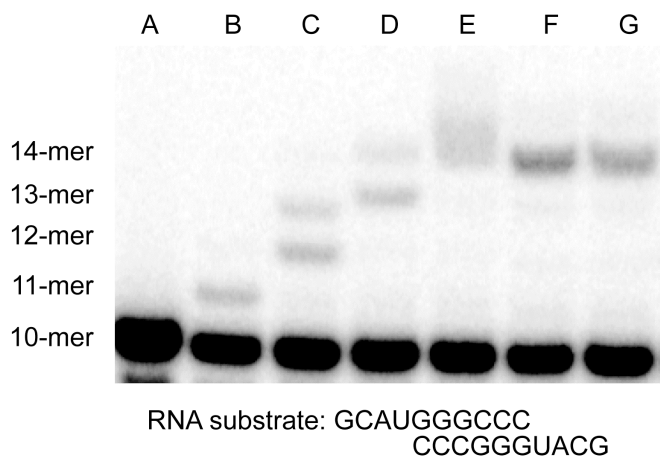

**Figure S11.** Steady state incorporation of **8**, **9** and natural nucleotides into double-stranded RNA by PV RdRP. Nucleotide incorporation reactions were initiated by addition of PV RDRP. Panel A: no nucleotide; Panel B: ATP; Panel C: ATP, UTP; Panel D: ATP, UTP, GTP; Panel E: ATP, UTP, GTP, CTP; Panel F: **8**, UTP, GTP, CTP; Panel G: **9**, UTP, GTP, CTP.
